# Supplementary material for: Patterns of ASFV Transmission in Domestic Pigs in Serbia
Source: MDPI journal article supplement (doi:10.3390/pathogens12010149), 2023-01-16
Supplement: s1 [file s1]

**Table S1.** The accession numbers of the B646L gene from the NCBI were used for the alignment with sequences from this study.

| Accession number | Country        | Year | Domestic pig/Wild boar |
|------------------|----------------|------|------------------------|
| KJ195685         | Russia         | 2012 | Domestic pig           |
| AF301537         | Portugal       | 1957 | Domestic pig           |
| MW451091         | Vietnam        | 2019 | Domestic pig           |
| MW451093         | Vietnam        | 2020 | Domestic pig           |
| MZ682070         | Vietnam        | 2020 | Domestic pig           |
| OP019317         | Russia         | 2021 | Domestic pig           |
| OM986194         | China          | 2021 | Domestic pig           |
| MW889890         | Czech Republic | 2018 | Wild boar              |
| LR536725         | Belgium        | 2018 | Wild boar              |
| LR722599         | Moldova        | 2017 | Wild boar              |
| LR722600         | Czech Republic | 2017 | LR722600               |
| LR899193         | Germany        | 2020 | Domestic pig           |
| MN715134         | Hungary        | 2018 | Wild boar              |
| MT847621         | Poland         | 2017 | Wild boar              |
| MT847622         | Poland         | 2017 | Wild boar              |
| MT851941         | Indonesia      | 2020 | Domestic pig           |
| MT840356         | Russia         | 2019 | Domestic pig           |
| MK189456         | China          | 2018 | Wild boar              |
| KJ496127         | Ukraine        | 2014 | Wild boar              |
| OQ060619         | Serbia         | 2021 | Domestic pig           |
| OQ060620         | Serbia         | 2021 | Domestic pig           |

|          |             |      |              |
|----------|-------------|------|--------------|
| OQ060621 | Serbia      | 2021 | Wild boar    |
| OQ060622 | Serbia      | 2021 | Domestic pig |
| OQ060623 | Serbia      | 2021 | Domestic pig |
| OQ060624 | Serbia      | 2021 | Domestic pig |
| OQ060625 | Serbia      | 2021 | Domestic pig |
| OQ060626 | Serbia      | 2021 | Wild boar    |
| OQ060627 | Serbia      | 2021 | Domestic pig |
| OQ060628 | Serbia      | 2021 | Domestic pig |
| OQ060629 | Serbia      | 2021 | Domestic pig |
| OQ060630 | Serbia      | 2021 | Wild boar    |
| OQ060631 | Serbia      | 2021 | Wild boar    |
| OQ060632 | Serbia      | 2021 | Wild boar    |
| OQ060633 | Serbia      | 2021 | Wild boar    |
| OQ060634 | Serbia      | 2021 | Wild boar    |
| JX857510 | Russia      | 2007 | Wild boar    |
| JX857511 | Russia      | 2008 | Wild boar    |
| JX857512 | Russia      | 2008 | Domestic pig |
| JX857518 | Russia      | 2009 | Domestic pig |
| JX857519 | Russia      | 2009 | Domestic pig |
| JX857521 | Ukraine     | 2012 | Domestic pig |
| MT771051 | South Korea | 2019 | Wild boar    |
| OM986132 | China       | 2019 | Domestic pig |
