# Supplementary material for: Patterns of ASFV Transmission in Domestic Pigs in Serbia
Source: MDPI journal article supplement (doi:10.3390/pathogens12010149), 2023-01-16
Supplement: s1 [file s1]

**Table S2.** The accession numbers of the B602L gene from the NCBI were used for the alignment with sequences from this study.

| Accession number | Country | Year | Domestic pig/Wild boar |
|------------------|---------|------|------------------------|
| OQ060635         | Serbia  | 2021 | Domestic pig           |
| OQ060636         | Serbia  | 2021 | Domestic pig           |
| OQ060637         | Serbia  | 2021 | Wild boar              |
| OQ060638         | Serbia  | 2021 | Domestic pig           |
| OQ060639         | Serbia  | 2021 | Domestic pig           |
| OQ060640         | Serbia  | 2021 | Domestic pig           |
| OQ060641         | Serbia  | 2021 | Domestic pig           |
| OQ060642         | Serbia  | 2021 | Wild boar              |
| OQ060643         | Serbia  | 2021 | Domestic pig           |
| OQ060644         | Serbia  | 2021 | Domestic pig           |
| OQ060645         | Serbia  | 2021 | Domestic pig           |
| OQ060646         | Serbia  | 2021 | Wild boar              |
| OQ060647         | Serbia  | 2021 | Wild boar              |
| OQ060648         | Serbia  | 2021 | Wild boar              |
| OQ060649         | Serbia  | 2021 | Wild boar              |
| OQ060650         | Serbia  | 2021 | Wild boar              |
| OQ060635         | Serbia  | 2021 | Domestic pig           |
| FR682468         | Georgia | 2007 | Domestic pig           |
| KY372397         | Russia  | 2015 | Domestic pig           |
| KY372398         | Russia  | 2016 | Domestic pig           |
| LR722599         | Moldova | 2017 | Wild boar              |

|          |             |      |              |
|----------|-------------|------|--------------|
| LR899193 | Germany     | 2020 | Wild boar    |
| LS478113 | Estonia     | 2014 | Wild boar    |
| MK628478 | Lithuania   | 2014 | Wild boar    |
| MN194591 | Ukraine     | 2016 | Domestic pig |
| MN715134 | Hungary     | 2018 | Wild boar    |
| MN809122 | Romania     | 2017 | Domestic pig |
| MT847620 | Poland      | 2017 | Wild boar    |
| MT847622 | Poland      | 2017 | Wild boar    |
| MW361944 | China       | 2019 | Domestic pig |
| MW451102 | Vietnam     | 2019 | Domestic pig |
| MW451105 | Vietnam     | 2020 | Domestic pig |
| OM966720 | Russia      | 2018 | Wild boar    |
| ON075797 | South Korea | 2019 | Wild boar    |
| ON108571 | Italy       | 2022 | Wild boar    |
| OP628183 | South Korea | 2020 | Wild boar    |
