# Supplementary material for: Patterns of ASFV Transmission in Domestic Pigs in Serbia
Source: Pathogens. 2023 Jan 16;12(1):149. doi: 10.3390/pathogens12010149 (PMC9862985; doi:10.3390/pathogens12010149)
Supplement: Supplementary file 1 [file pathogens-12-00149-s001.zip]

Archive with 4 entries (4 files):
- supplementary1. List of questions.pdf
- Supplementary2. Answers of the questionaree.pdf
- Table S3. Sequences used in the B646L gene phylogenetic study.pdf
- Table S4. Sequences used in the B602L phylogenetic study.pdf
